# Supplementary material for: Novel Insights into the Biochemical Mechanism of CK1ε and its Functional Interplay with DDX3X
Source: MDPI journal article supplement (doi:10.3390/ijms21176449), 2020-09-03
Supplement: s1 [file s1]

# **Novel insights into the biochemical mechanism of CK1 $\epsilon$ and its functional interplay with DDX3X**

**Bartolo Bono<sup>1</sup>, Giulia Franco<sup>1</sup>, Valentina Riva<sup>1</sup>, Anna Garbelli<sup>1</sup> and Giovanni Maga<sup>1,\*</sup>**

<sup>1</sup> Institute of Molecular Genetics IGM-CNR “Luigi Luca Cavalli-Sforza”, via Abbiategrasso 207, 27100 Pavia (Italy)

\* Corresponding author: Dr. Giovanni Maga; E-mail: [giovanni.maga@igm.cnr.it](mailto:giovanni.maga@igm.cnr.it); Tel: +390382546322

## **Supplementary Information**

**Supplementary Figures 1A-D:** original images for Blots and Gels Requirements;

**Supplementary Figures 1E-F** Effect of the presence of DDX3X on Dvl2 phosphorylation by CK1 $\epsilon$

Supplementary Figure 1A: Original images for figure 6 A

Autoradiography

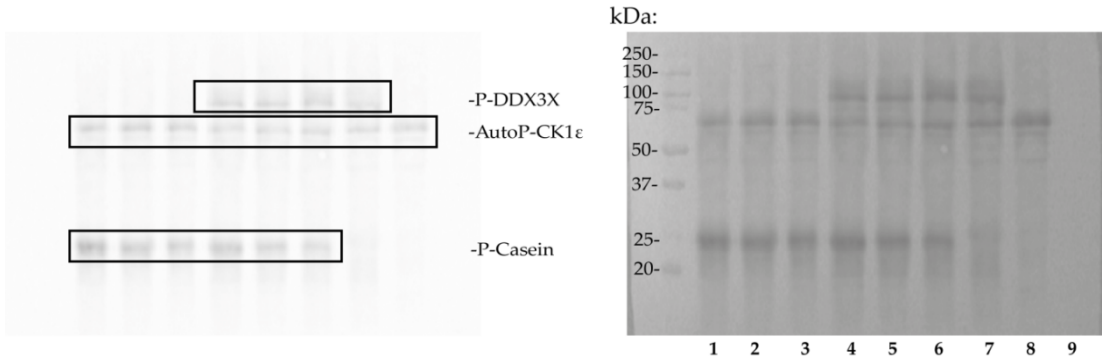

Uncropped and unadjusted western blotting images

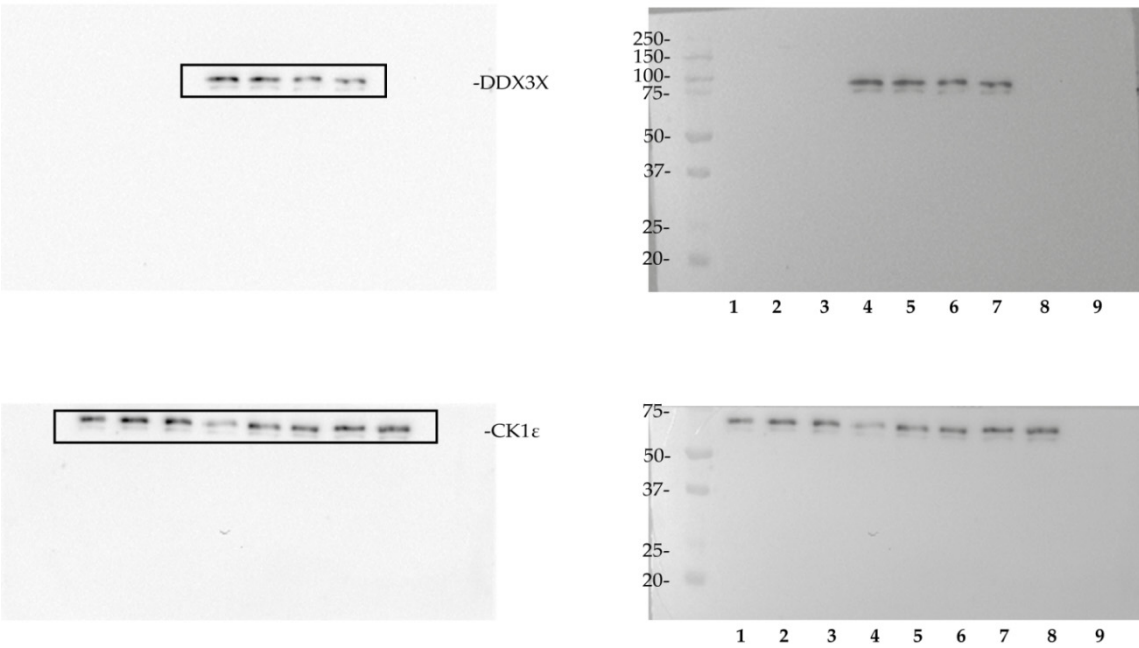

Supplementary Figure 1B: Original images for Figure 6 C

Autoradiography

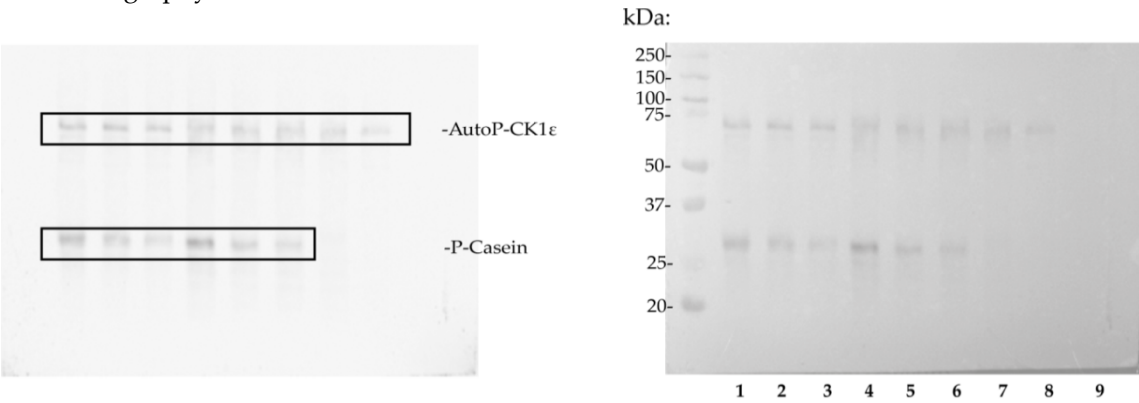

Uncropped and unadjusted western blotting images

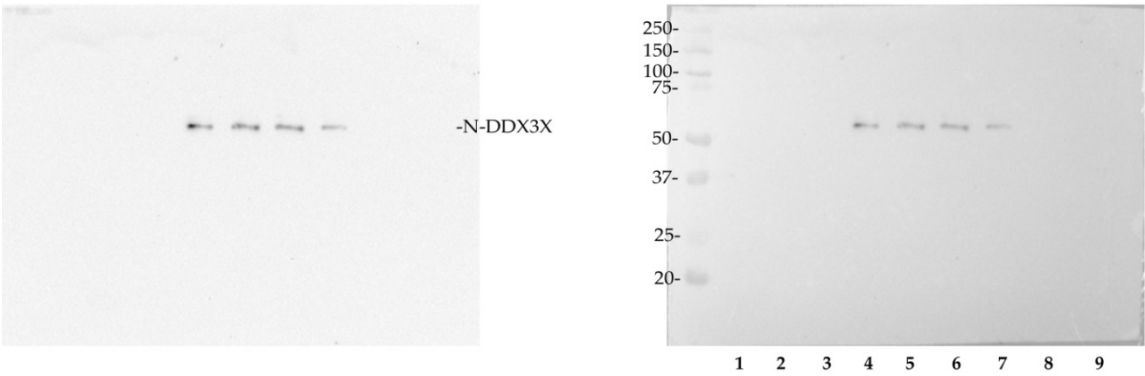

Supplementary Figure 1 C-D: Original images for Supplementary Figure 1 E-F

Autoradiography

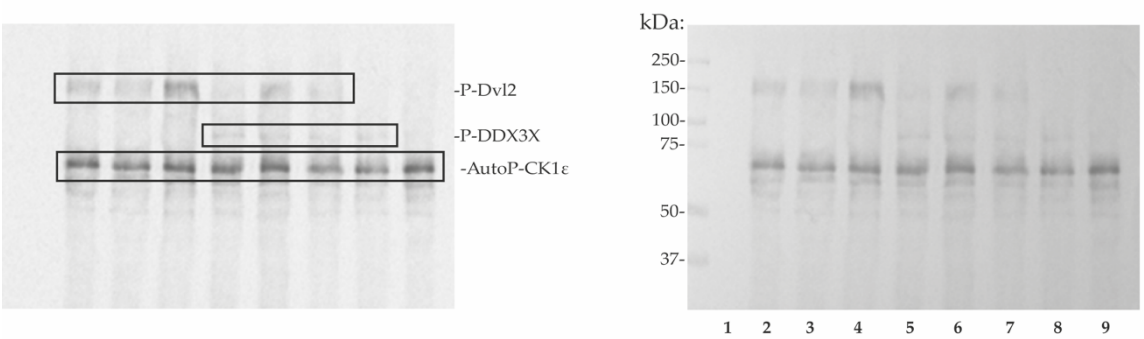

Western Blotting

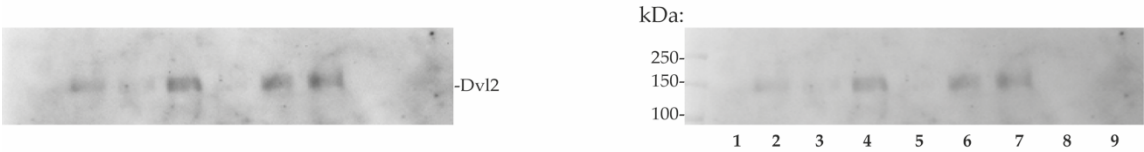

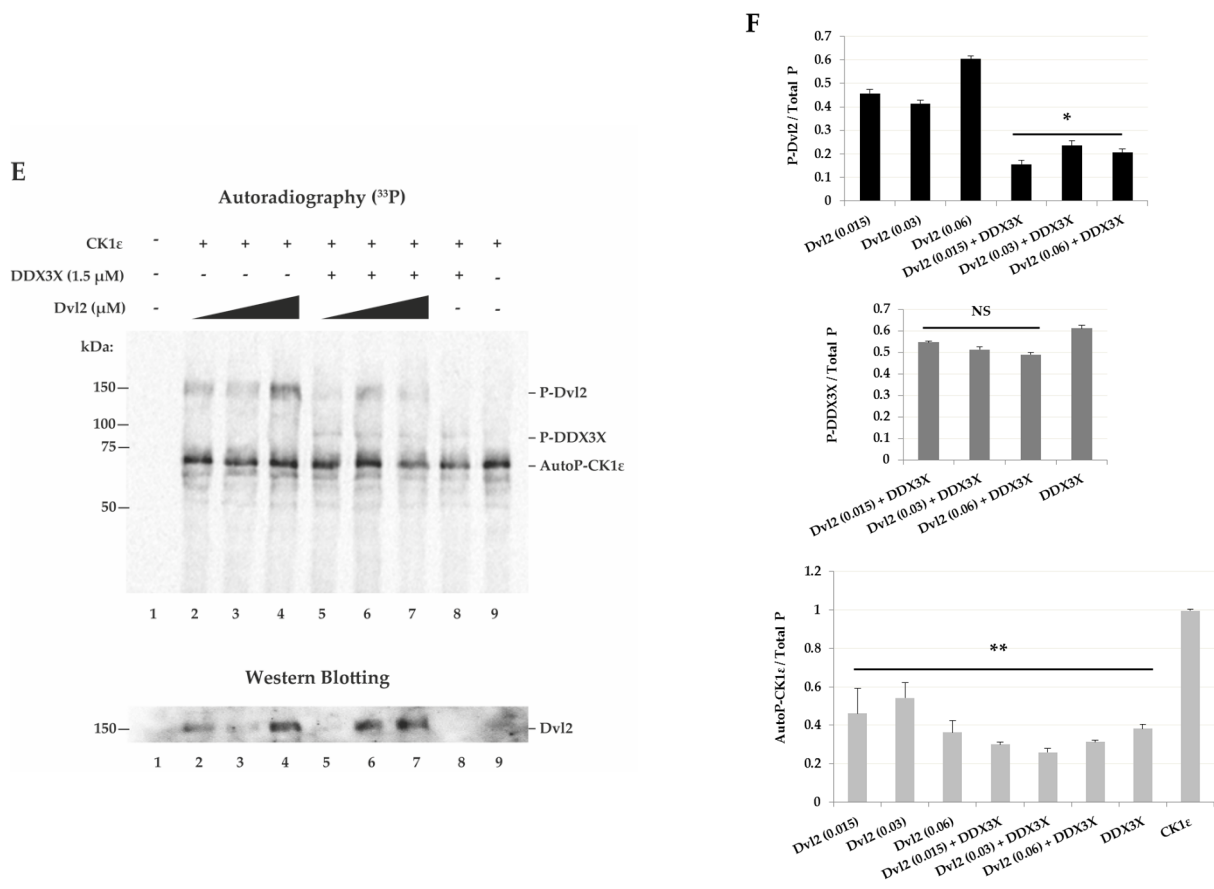

**Supp. Figure 1 E-F. Effect of the presence of DDX3X on Dvl2 phosphorylation by CK1 $\epsilon$ .** (E) DDX3X, CK1 $\epsilon$  and Dvl2  $\gamma$ - $^{33}\text{P}$  incorporation visualized by autoradiography on nitrocellulose membrane (upper panel). Western blot analysis of Dvl2 protein of the same membrane (lower panel). (F) Quantification of autoradiographic  $\gamma$ - $^{33}\text{P}$  signal (panel E). Bars indicate mean  $\pm$  SD. \* and \*\* indicate  $p$ -value  $< 0.05$  and  $< 0.01$  respectively. NS: not significant.
